# Supplementary material for: Modelling recurrent events: comparison of statistical models with continuous and discontinuous risk intervals on recurrent malaria episodes data
Source: Malar J. 2014 Jul 29;13:293. doi: 10.1186/1475-2875-13-293 (PMC4132199; doi:10.1186/1475-2875-13-293)
Supplement: Additional file 1 — Stata (Stata Corporation 2011) and R codes for the different models. [file 1475-2875-13-293-S1.pdf]

### Additional file 1 Stata (Stata Corporation 2011) and R codes for the different models

| Models                          | Stata codes                                                                                         | R codes                                                                                                                       |
|---------------------------------|-----------------------------------------------------------------------------------------------------|-------------------------------------------------------------------------------------------------------------------------------|
| <b>GEE Poisson distribution</b> | xi: xtgee episode i.treatcat i.agecat,<br>eform f(poisson) i(ID) l(log)<br>cor(exch) t(time) robust | mod_gee <- gee(episode~<br>treatcat + agecat, data =<br>table_long, id = ID, family =<br>poisson, corstr =<br>"exchangeable") |
| <b>AG-CP</b>                    | xi: stcox i.treatcat i.agecat, efron<br>nolog cluster(ID)                                           | mod_AG<-coxph(Surv(start,<br>end,<br>episode)~treatcat+agecat+<br>cluster="ID", data=<br>table_long)                          |
| <b>PWP-CP</b>                   | xi: stcox i.treatcat i.agecat, efron<br>nolog cluster(ID) strata(order)                             | mod_PWP<-<br>coxph(Surv(start, end,<br>episode)~treatcat+agecat+<br>cluster="ID",<br>strata="order",data=<br>table_long)      |
| <b>Frailty Gamma</b>            | xi: streg i.treatcat i.agecat, d(weib)<br>frailty(gamma) shared(ID) nolog                           | mod_frailty<-<br>coxph(Surv(start, end,<br>episode)~treatcat+agecat+<br>frailty (ID,<br>dist="gamma"),data=<br>table_long)    |

Variables names and signification are provided in the data dictionary in Table 1.

#### For Stata codes:

For GEE Poisson distribution: xi: meaning using dummy codes for independent variables (i.treatcat=treatment category, i.agecat=age. Dummy codes for treatment category were: AL=0, AS+AQ=1, AS+SP=2; Dummy codes for age category were: <5year=2, 5-9years=1, >9years=0; xtgee function fits a population-averaged panel-data models by using GEE; eform is the displaying function for the exponentiated coefficients; f(poisson) is poisson family function; i is the patient identification variable; l(log) is logarithm link function; cor(exch) is the correlation structure function with exchangeable option; t(time) is the time function linking the time/duration (days here); robust is a roust standard error function.

For AG-CP, PWP-CP and Frailty Gamma models, there is a need to declare the survival expression by the following syntax: stset end, failure(episode) exit(end) enter(start).

#### For R codes: require gee and survival packages.

For GEE Poisson distribution: mod\_gee is the object name; gee is a function for generalized estimation equation; table\_long is the data format used in Table 1; id is the patient identification variable; corstr is the correlation structure.

For AG-CP and PWP-CP models: `mod_AG` and `mod_PWP` are the object name respectively for AG and PWP-CP models; `coxph` is the Cox Proportional hazard function; `Surv` is the Survival function; `strata` fits a stratified Cox model by ordered malaria episodes.

For Frailty Gamma model: `mod_frailty` is the object name; `frailty` is the shared frailty function within patient with gamma distribution.
